# Supplementary material for: High Proportions of Radiation-Resistant Strains in Culturable Bacteria from the Taklimakan Desert
Source: MDPI journal article supplement (doi:10.3390/biology11040501), 2022-03-24
Supplement: s1 [file s1]

## Supplementary Figures

(A)

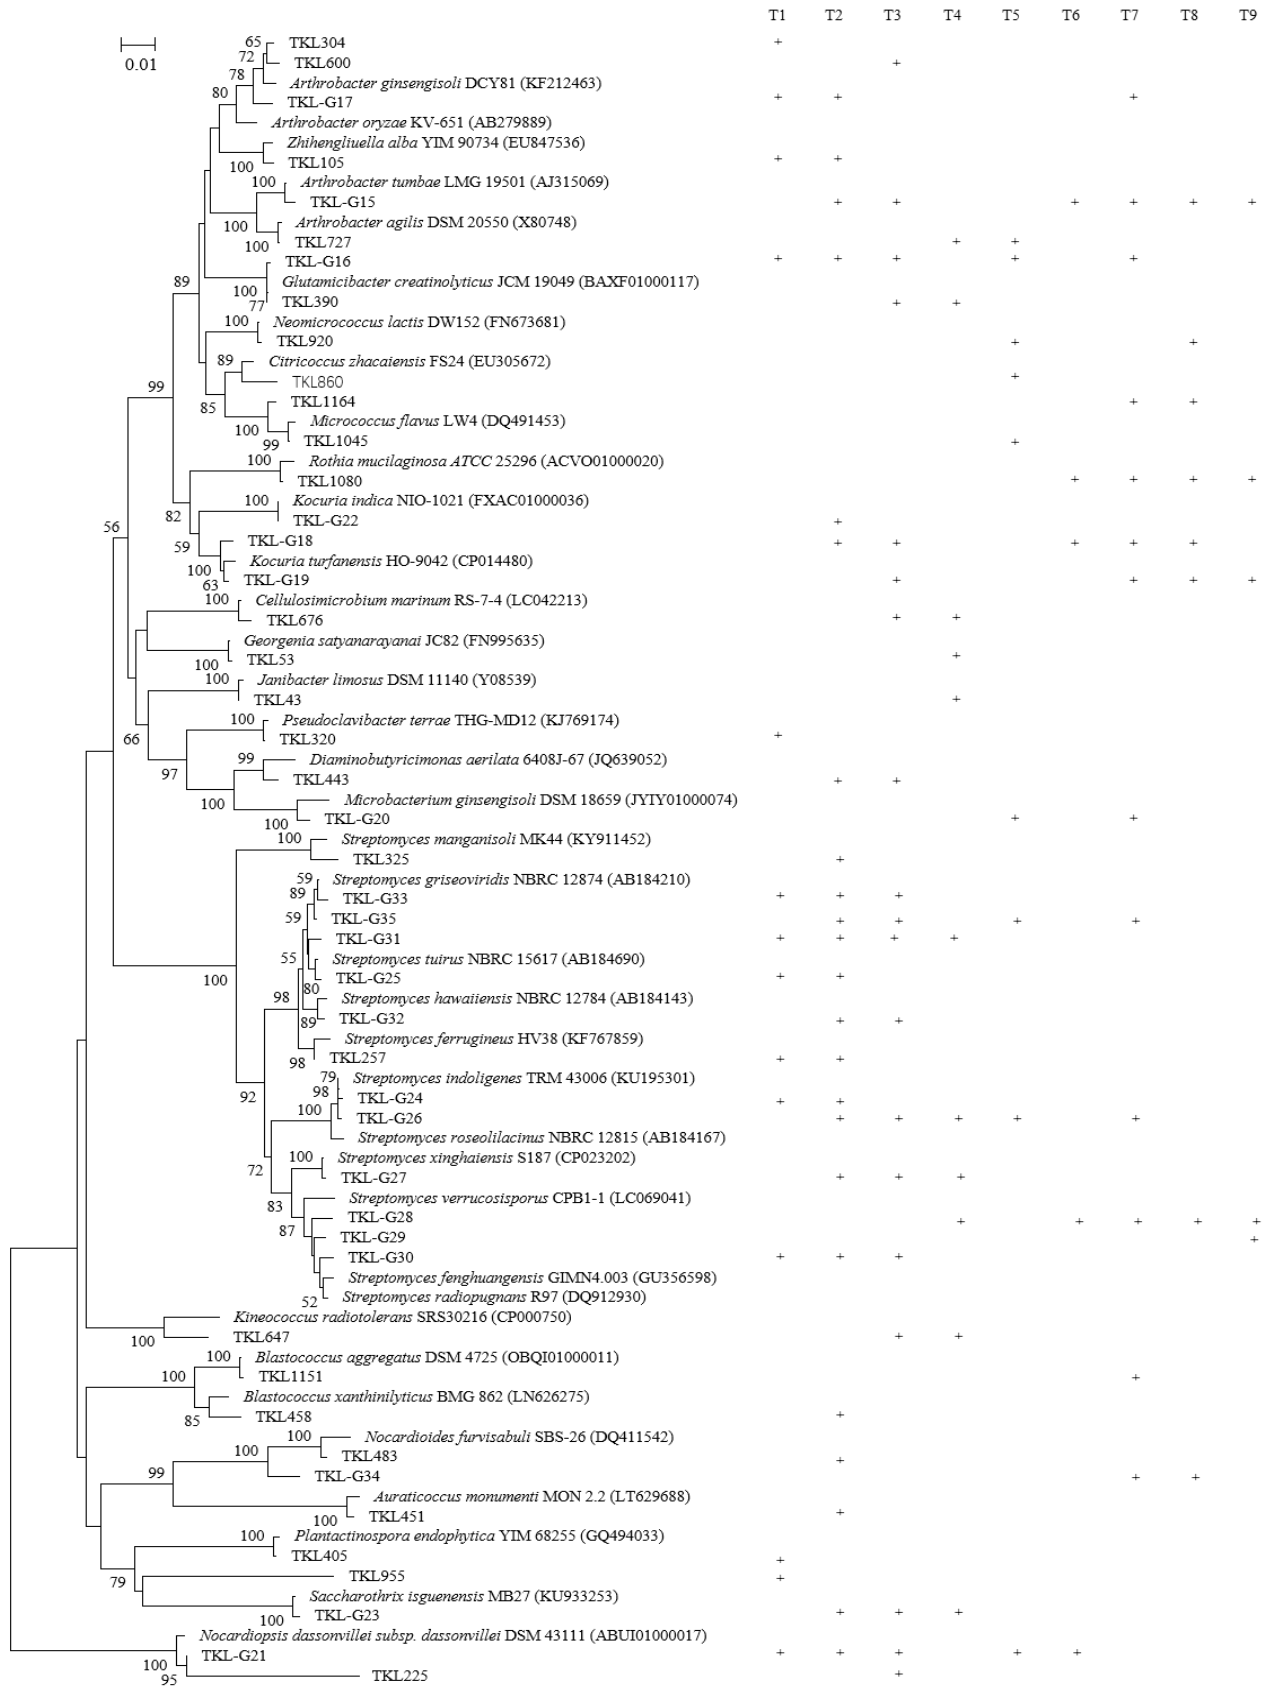

(B)

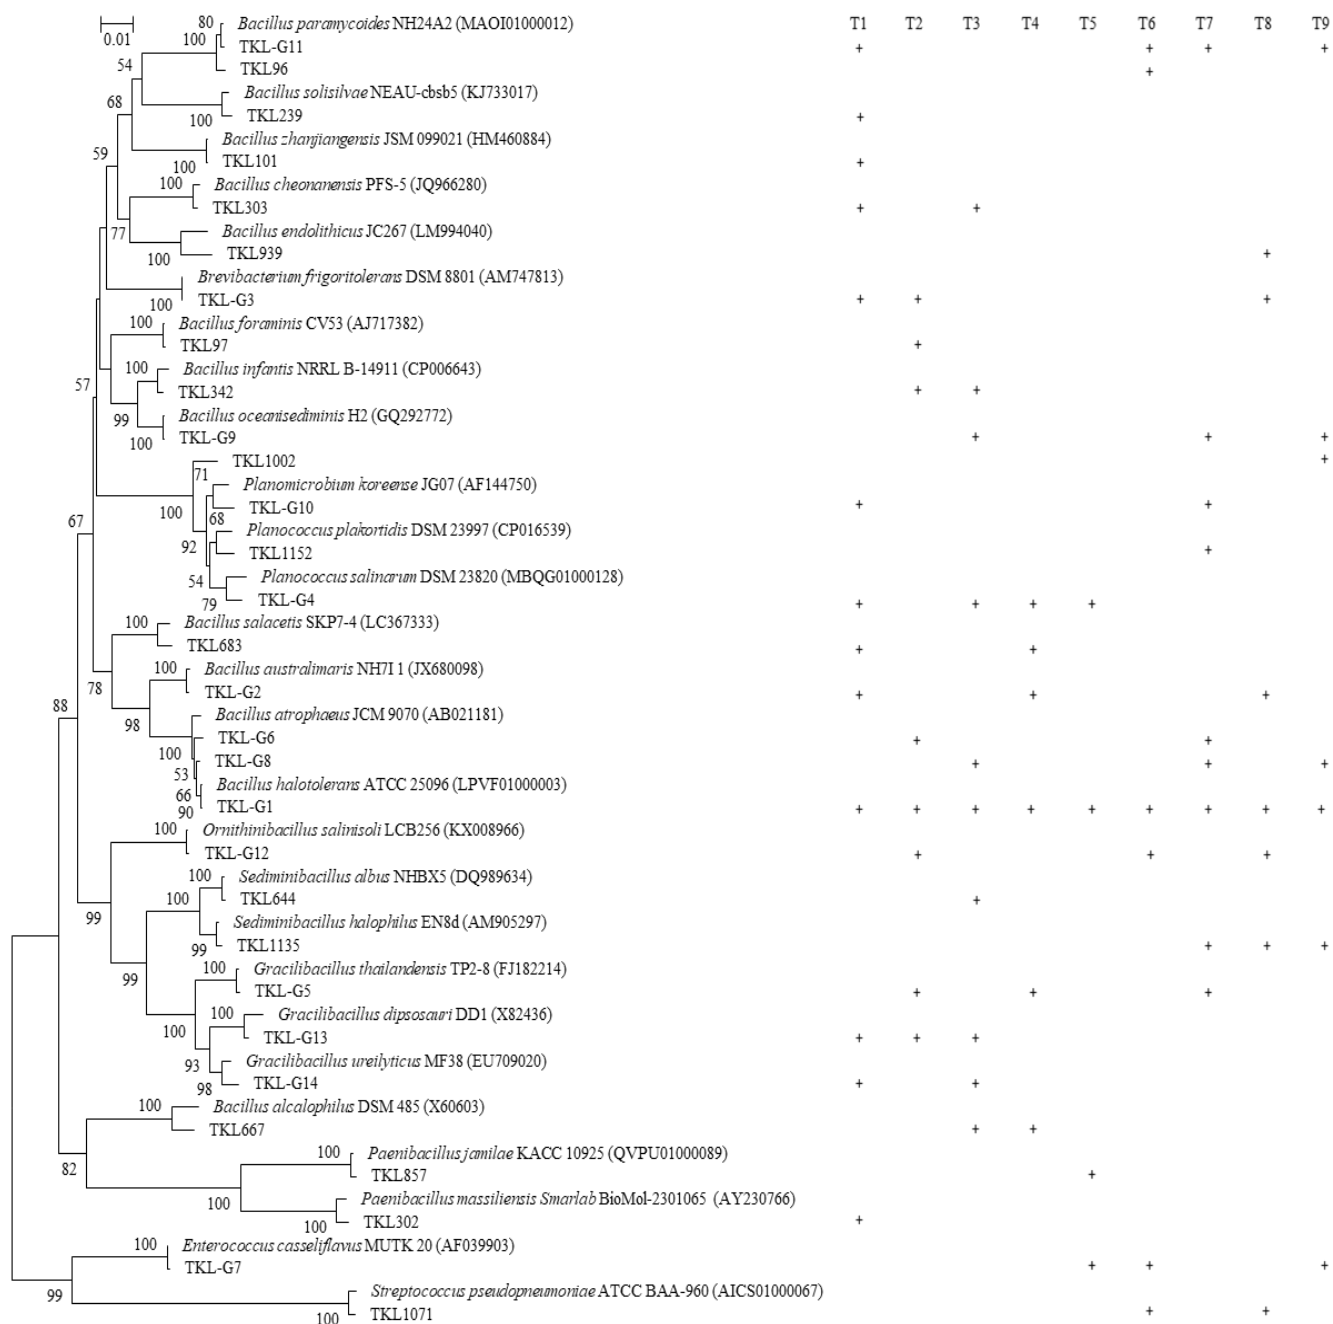

(C)

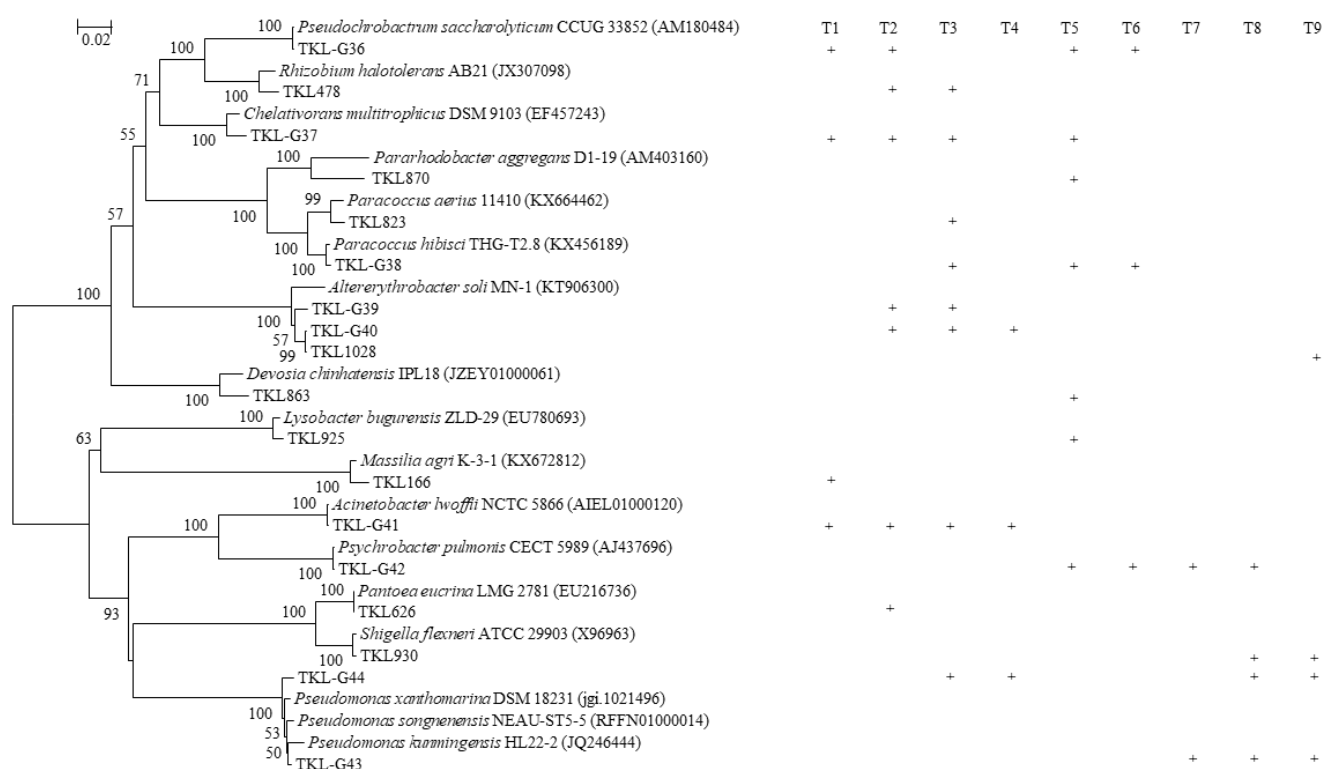

(D)

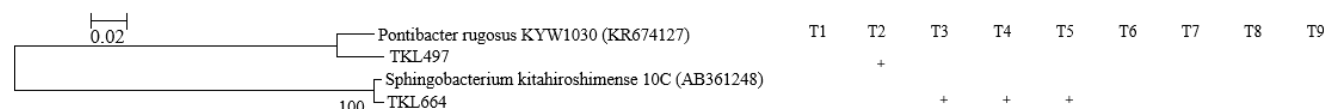

Figure S1. Neighbour-joining phylogenetic trees of the phyla of Actinobacteria (A), Firmicutes (B), Proteobacteria (C), and Bacteroidetes (D) based on the 16S rRNA gene sequences and the distribution of the phylotypes. The symbol + refers that the stain was cultured in the sites (T1~T9). The TKL-GN (N = 1~44) represent strain of the group 1 - 44, in which the strains from the same group have the higher similarity than 99% of the 16S rRNA gene sequences (Details in Table S1). The numbers at the nodes indicate the level of bootstrap support based on neighbor-joining tree reconstruction with 1000 resampling; bootstrap values higher than 50% are showed.

## Supplementary Table

Table S1. Phylogenetic similarity and color of culturable bacteria in the Taklimakan Desert

| Strain No. | Similarity Strain                                             | Accession No. | Similarity/ % | Group | Color |
|------------|---------------------------------------------------------------|---------------|---------------|-------|-------|
| TKL21      | <i>Bacillus tequilensis</i> KCTC 13622                        | MW827806      | 99.86         | G1    | White |
| TKL22      | <i>Bacillus tequilensis</i> KCTC 13622                        | MW827807      | 99.93         | G1    | White |
| TKL40      | <i>Bacillus subtilis</i> subsp. <i>Stercoris</i> D7XPN1       | MW827816      | 99.84         | G1    | White |
| TKL44      | <i>Bacillus subtilis</i> subsp. <i>Stercoris</i> D7XPN1       | MW827818      | 99.84         | G1    | White |
| TKL45      | <i>Bacillus tequilensis</i> KCTC 13622                        | MW827819      | 99.86         | G1    | White |
| TKL75      | <i>Bacillus subtilis</i> subsp. <i>Stercoris</i> D7XPN1       | MW827825      | 99.20         | G1    | White |
| TKL77      | <i>Bacillus subtilis</i> subsp. <i>Stercoris</i> D7XPN1       | MW827826      | 99.84         | G1    | White |
| TKL78      | <i>Bacillus halotolerans</i> ATCC 25096                       | MW827827      | 99.93         | G1    | White |
| TKL80      | <i>Bacillus subtilis</i> subsp. <i>Stercoris</i> D7XPN1       | MW827828      | 99.84         | G1    | White |
| TKL86      | <i>Bacillus subtilis</i> subsp. <i>Stercoris</i> D7XPN1       | MW827830      | 99.92         | G1    | White |
| TKL89      | <i>Bacillus subtilis</i> subsp. <i>Stercoris</i> D7XPN1       | MW827831      | 99.92         | G1    | White |
| TKL90      | <i>Bacillus subtilis</i> subsp. <i>Stercoris</i> D7XPN1       | MW827832      | 99.92         | G1    | White |
| TKL98      | <i>Bacillus halotolerans</i> ATCC 25096                       | MW827839      | 99.93         | G1    | White |
| TKL104     | <i>Bacillus halotolerans</i> ATCC 25096                       | MW827843      | 99.93         | G1    | White |
| TKL106     | <i>Bacillus subtilis</i> subsp. <i>Stercoris</i> D7XPN1       | MW827845      | 99.92         | G1    | White |
| TKL109     | <i>Bacillus subtilis</i> subsp. <i>Stercoris</i> D7XPN1       | MW827846      | 99.92         | G1    | White |
| TKL114     | <i>Bacillus halotolerans</i> ATCC 25096                       | MW827847      | 99.93         | G1    | White |
| TKL116     | <i>Bacillus subtilis</i> subsp. <i>Inaquosorum</i> KCTC 13429 | MW827848      | 100.00        | G1    | White |
| TKL117     | <i>Bacillus subtilis</i> subsp. <i>Stercoris</i> D7XPN1       | MW827849      | 99.92         | G1    | White |
| TKL123     | <i>Bacillus tequilensis</i> KCTC 13622                        | MW827852      | 99.86         | G1    | White |
| TKL126     | <i>Bacillus subtilis</i> subsp. <i>Stercoris</i> D7XPN1       | MW827853      | 99.84         | G1    | White |
| TKL130     | <i>Bacillus halotolerans</i> ATCC 25096                       | MW827854      | 99.93         | G1    | White |
| TKL131     | <i>Bacillus halotolerans</i> ATCC 25096                       | MW827855      | 99.86         | G1    | White |
| TKL134     | <i>Bacillus subtilis</i> subsp. <i>Stercoris</i> D7XPN1       | MW827856      | 99.68         | G1    | White |
| TKL135     | <i>Bacillus halotolerans</i> ATCC 25096                       | MW827857      | 99.93         | G1    | White |
| TKL139     | <i>Bacillus halotolerans</i> ATCC 25096                       | MW827858      | 100.00        | G1    | White |
| TKL142     | <i>Bacillus subtilis</i> subsp. <i>Stercoris</i> D7XPN1       | MW827859      | 99.92         | G1    | White |
| TKL144     | <i>Bacillus subtilis</i> subsp. <i>Stercoris</i> D7XPN1       | MW827860      | 99.92         | G1    | White |
| TKL149     | <i>Bacillus subtilis</i> subsp. <i>Stercoris</i> D7XPN1       | MW827862      | 99.60         | G1    | White |
| TKL212     | <i>Bacillus halotolerans</i> ATCC 25096                       | MW827871      | 99.93         | G1    | White |
| TKL220     | <i>Bacillus subtilis</i> subsp. <i>Stercoris</i> D7XPN1       | MW827872      | 99.92         | G1    | White |
| TKL221     | <i>Bacillus subtilis</i> subsp. <i>Stercoris</i> D7XPN1       | MW827873      | 99.92         | G1    | White |
| TKL222     | <i>Bacillus subtilis</i> subsp. <i>Stercoris</i> D7XPN1       | MW827874      | 99.92         | G1    | White |
| TKL228     | <i>Bacillus subtilis</i> subsp. <i>Stercoris</i> D7XPN1       | MW827877      | 99.92         | G1    | White |
| TKL232     | <i>Bacillus halotolerans</i> ATCC 25096                       | MW827878      | 99.93         | G1    | White |
| TKL235     | <i>Bacillus halotolerans</i> ATCC 25096                       | MW827880      | 99.93         | G1    | White |
| TKL236     | <i>Bacillus halotolerans</i> ATCC 25096                       | MW827881      | 99.93         | G1    | White |
| TKL247     | <i>Bacillus subtilis</i> subsp. <i>Inaquosorum</i> KCTC 13429 | MW827886      | 99.86         | G1    | White |
| TKL248     | <i>Bacillus subtilis</i> subsp. <i>Stercoris</i> D7XPN1       | MW827887      | 99.92         | G1    | White |
| TKL250     | <i>Bacillus subtilis</i> subsp. <i>Stercoris</i> D7XPN1       | MW827888      | 99.92         | G1    | White |
| TKL258     | <i>Bacillus subtilis</i> subsp. <i>Stercoris</i> D7XPN1       | MW827890      | 99.92         | G1    | White |

| Strain No. | Similarity Strain                                              | Accession No. | Similarity/ % | Group | Color |
|------------|----------------------------------------------------------------|---------------|---------------|-------|-------|
| TKL261     | <i>Bacillus subtilis</i> subsp. <i>Stercoris</i> D7XPN1        | MW827891      | 99.92         | G1    | White |
| TKL264     | <i>Bacillus tequilensis</i> KCTC 13622                         | MW827893      | 99.93         | G1    | White |
| TKL280     | <i>Bacillus halotolerans</i> ATCC 25096                        | MW827895      | 99.93         | G1    | White |
| TKL283     | <i>Bacillus halotolerans</i> ATCC 25096                        | MW827897      | 99.93         | G1    | White |
| TKL285     | <i>Bacillus halotolerans</i> ATCC 25096                        | MW827898      | 99.93         | G1    | White |
| TKL292     | <i>Bacillus subtilis</i> subsp. <i>Stercoris</i> D7XPN1        | MW827900      | 99.92         | G1    | White |
| TKL293     | <i>Bacillus subtilis</i> subsp. <i>Stercoris</i> D7XPN1        | MW827901      | 99.92         | G1    | White |
| TKL294     | <i>Bacillus halotolerans</i> ATCC 25096                        | MW827902      | 99.93         | G1    | Red   |
| TKL295     | <i>Bacillus subtilis</i> subsp. <i>Stercoris</i> D7XPN1        | MW827903      | 99.92         | G1    | White |
| TKL296     | <i>Bacillus subtilis</i> subsp. <i>Inaquosorum</i> KCTC 13429  | MW827904      | 100.00        | G1    | White |
| TKL298     | <i>Bacillus subtilis</i> subsp. <i>Inaquosorum</i> KCTC 13429  | MW827905      | 100.00        | G1    | White |
| TKL314     | <i>Bacillus subtilis</i> subsp. <i>Inaquosorum</i> KCTC 13429  | MW827912      | 100.00        | G1    | White |
| TKL350     | <i>Bacillus subtilis</i> subsp. <i>Stercoris</i> D7XPN1        | MW827922      | 99.92         | G1    | White |
| TKL355     | <i>Bacillus halotolerans</i> ATCC 25096                        | MW827925      | 99.93         | G1    | White |
| TKL361     | <i>Bacillus subtilis</i> subsp. <i>Stercoris</i> D7XPN1        | MW827926      | 99.92         | G1    | White |
| TKL362     | <i>Bacillus tequilensis</i> KCTC 13622                         | MW827927      | 99.86         | G1    | White |
| TKL367     | <i>Bacillus halotolerans</i> ATCC 25096                        | MW827928      | 99.93         | G1    | White |
| TKL398     | <i>Bacillus subtilis</i> subsp. <i>Stercoris</i> D7XPN1        | MW827933      | 99.92         | G1    | White |
| TKL403     | <i>Bacillus subtilis</i> subsp. <i>Stercoris</i> D7XPN1        | MW827935      | 99.92         | G1    | White |
| TKL407     | <i>Bacillus subtilis</i> subsp. <i>Stercoris</i> D7XPN1        | MW827937      | 99.20         | G1    | White |
| TKL412     | <i>Bacillus subtilis</i> subsp. <i>Stercoris</i> D7XPN1        | MW827938      | 99.68         | G1    | White |
| TKL437     | <i>Bacillus subtilis</i> subsp. <i>Stercoris</i> D7XPN1        | MW827942      | 99.60         | G1    | White |
| TKL459     | <i>Bacillus subtilis</i> subsp. <i>Stercoris</i> D7XPN1        | MW827952      | 99.92         | G1    | White |
| TKL468     | <i>Bacillus subtilis</i> subsp. <i>Stercoris</i> D7XPN1        | MW827954      | 99.92         | G1    | White |
| TKL481     | <i>Bacillus subtilis</i> subsp. <i>Spizizenii</i> NRRL B-23049 | MW827956      | 99.93         | G1    | White |
| TKL585     | <i>Bacillus halotolerans</i> ATCC 25096                        | MW827984      | 99.93         | G1    | White |
| TKL588     | <i>Bacillus subtilis</i> subsp. <i>Inaquosorum</i> KCTC 13429  | MW827985      | 99.93         | G1    | White |
| TKL607     | <i>Bacillus tequilensis</i> KCTC 13622                         | MW827995      | 99.93         | G1    | White |
| TKL609     | <i>Bacillus atrophaeus</i> JCM 9070                            | MW827997      | 99.93         | G1    | White |
| TKL677     | <i>Bacillus subtilis</i> subsp. <i>Stercoris</i> D7XPN1        | MW828023      | 99.92         | G1    | White |
| TKL637     | <i>Bacillus subtilis</i> subsp. <i>Stercoris</i> D7XPN1        | MW828005      | 99.92         | G1    | White |
| TKL657     | <i>Bacillus subtilis</i> subsp. <i>Stercoris</i> D7XPN1        | MW828016      | 99.92         | G1    | White |
| TKL658     | <i>Bacillus subtilis</i> subsp. <i>Stercoris</i> D7XPN1        | MW828017      | 99.92         | G1    | White |
| TKL674     | <i>Bacillus halotolerans</i> ATCC 25096                        | MW828020      | 99.93         | G1    | White |
| TKL680     | <i>Bacillus atrophaeus</i> JCM 9070                            | MW828024      | 99.85         | G1    | White |
| TKL689     | <i>Bacillus halotolerans</i> ATCC 25096                        | MW828027      | 99.93         | G1    | White |
| TKL692     | <i>Bacillus subtilis</i> subsp. <i>Stercoris</i> D7XPN1        | MW828029      | 99.92         | G1    | White |
| TKL819     | <i>Bacillus subtilis</i> subsp. <i>Stercoris</i> D7XPN1        | MW828034      | 99.92         | G1    | White |
| TKL873     | <i>Bacillus subtilis</i> subsp. <i>Stercoris</i> D7XPN1        | MW828046      | 99.92         | G1    | White |
| TKL875     | <i>Bacillus subtilis</i> subsp. <i>Stercoris</i> D7XPN1        | MW828047      | 99.92         | G1    | White |
| TKL889     | <i>Bacillus subtilis</i> subsp. <i>Inaquosorum</i> KCTC 13429  | MW828050      | 99.86         | G1    | White |
| TKL916     | <i>Bacillus subtilis</i> subsp. <i>Stercoris</i> D7XPN1        | MW828055      | 99.68         | G1    | White |
| TKL918     | <i>Bacillus subtilis</i> subsp. <i>Stercoris</i> D7XPN1        | MW828057      | 99.68         | G1    | White |

| Strain No. | Similarity Strain                                                    | Accession No. | Similarity/ % | Group | Color  |
|------------|----------------------------------------------------------------------|---------------|---------------|-------|--------|
| TKL927     | <i>Bacillus subtilis</i> subsp. <i>Stercoris</i> D7XPN1              | MW828060      | 99.52         | G1    | White  |
| TKL938     | <i>Bacillus subtilis</i> subsp. <i>Inaquosorum</i> KCTC 13429        | MW828064      | 99.86         | G1    | White  |
| TKL1018    | <i>Bacillus subtilis</i> subsp. <i>Stercoris</i> D7XPN1              | MW828080      | 99.92         | G1    | White  |
| TKL1025    | <i>Bacillus subtilis</i> subsp. <i>Stercoris</i> D7XPN1              | MW828084      | 99.92         | G1    | White  |
| TKL1044    | <i>Bacillus subtilis</i> subsp. <i>Inaquosorum</i> KCTC 13429        | MW828090      | 100.00        | G1    | White  |
| TKL1046    | <i>Bacillus subtilis</i> subsp. <i>Stercoris</i> D7XPN1              | MW828092      | 100.00        | G1    | White  |
| TKL1052    | <i>Bacillus subtilis</i> subsp. <i>Stercoris</i> D7XPN1              | MW828095      | 99.92         | G1    | White  |
| TKL1053    | <i>Bacillus subtilis</i> subsp. <i>Stercoris</i> D7XPN1              | MW828096      | 99.92         | G1    | White  |
| TKL1058    | <i>Bacillus subtilis</i> subsp. <i>Stercoris</i> D7XPN1              | MW828100      | 99.76         | G1    | White  |
| TKL1059    | <i>Bacillus subtilis</i> subsp. <i>Stercoris</i> D7XPN1              | MW828101      | 99.52         | G1    | White  |
| TKL1088    | <i>Bacillus subtilis</i> subsp. <i>Stercoris</i> D7XPN1              | MW828110      | 99.84         | G1    | White  |
| TKL1120    | <i>Bacillus subtilis</i> subsp. <i>Stercoris</i> D7XPN1              | MW828122      | 99.68         | G1    | White  |
| TKL1122    | <i>Bacillus tequilensis</i> KCTC 13622                               | MW828124      | 99.72         | G1    | White  |
| TKL1125    | <i>Bacillus subtilis</i> subsp. <i>Stercoris</i> D7XPN1              | MW828125      | 99.68         | G1    | White  |
| TKL1128    | <i>Bacillus subtilis</i> subsp. <i>Stercoris</i> D7XPN1              | MW828127      | 99.76         | G1    | White  |
| TKL38      | <i>Bacillus australimaris</i> NH7L_1                                 | MW827815      | 99.93         | G2    | White  |
| TKL318     | <i>Bacillus altitudinis</i> 41KF2b                                   | MW827914      | 100.00        | G2    | White  |
| TKL942     | <i>Bacillus pumilus</i> ATCC 7061                                    | MW828066      | 99.79         | G2    | White  |
| TKL512     | <i>Brevibacterium frigoritolerans</i> DSM 8801                       | MW827967      | 100.00        | G3    | Red    |
| TKL321     | <i>Brevibacterium frigoritolerans</i> DSM 8801                       | MW827916      | 99.86         | G3    | White  |
| TKL640     | <i>Planomicrobium koreense</i> JG07                                  | MW828006      | 99.06         | G4    | White  |
| TKL27      | <i>Planococcus salinarum</i> DSM 23820                               | MW827811      | 98.51         | G4    | White  |
| TKL19      | <i>Gracilibacillus thailandensis</i> TP2-8                           | MW827804      | 98.90         | G5    | Pink   |
| TKL51      | <i>Gracilibacillus saliphilus</i> YIM 91119                          | MW827822      | 100.00        | G5    | Red    |
| TKL442     | <i>Enterococcus casseliflavus</i> MUTK 20                            | MW827944      | 99.93         | G6    | White  |
| TKL1155    | <i>Staphylococcus hominis</i> subsp. <i>Novobiosepticus</i> GTC 1228 | MW828139      | 99.51         | G6    | White  |
| TKL48      | <i>Bacillus velezensis</i> CR-502                                    | MW827820      | 99.93         | G7    | White  |
| TKL1097    | <i>Bacillus velezensis</i> CR-502                                    | MW828114      | 99.78         | G7    | White  |
| TKL23      | <i>Bacillus velezensis</i> CR-502                                    | MW827808      | 99.57         | G7    | White  |
| TKL1015    | <i>Bacillus tequilensis</i> KCTC 13622                               | MW828078      | 99.93         | G8    | White  |
| TKL1016    | <i>Bacillus subtilis</i> subsp. <i>Stercoris</i> D7XPN1              | MW828079      | 99.84         | G8    | White  |
| TKL1163    | <i>Bacillus oceanisediminis</i> H2                                   | MW828143      | 99.93         | G9    | White  |
| TKL1012    | <i>Bacillus oceanisediminis</i> H2                                   | MW828077      | 99.93         | G9    | White  |
| TKL650     | <i>Bacillus oceanisediminis</i> H2                                   | MW828012      | 99.64         | G9    | White  |
| TKL25      | <i>Planomicrobium koreense</i> JG07                                  | MW827809      | 98.86         | G10   | Yellow |
| TKL1160    | <i>Planomicrobium koreense</i> JG07                                  | MW828142      | 98.60         | G10   | White  |
| TKL9       | <i>Bacillus thuringiensis</i> ATCC 10792                             | MW827799      | 99.93         | G11   | White  |
| TKL15      | <i>Bacillus thuringiensis</i> ATCC 10792                             | MW827800      | 99.86         | G11   | White  |
| TKL94      | <i>Bacillus thuringiensis</i> ATCC 10792                             | MW827835      | 99.93         | G11   | White  |
| TKL95      | <i>Bacillus thuringiensis</i> ATCC 10792                             | MW827836      | 99.86         | G11   | White  |
| TKL103     | <i>Bacillus paramycoides</i> NH24A2                                  | MW827842      | 99.86         | G11   | White  |
| TKL1026    | <i>Bacillus paramycoides</i> NH24A2                                  | MW828085      | 99.79         | G11   | White  |
| TKL1090    | <i>Bacillus cereus</i> ATCC 14579                                    | MW828111      | 99.67         | G11   | White  |

| Strain No. | Similarity Strain                                        | Accession No. | Similarity/ % | Group | Color |
|------------|----------------------------------------------------------|---------------|---------------|-------|-------|
| TKL1095    | <i>Bacillus paramycoides</i> NH24A2                      | MW828113      | 99.79         | G11   | White |
| TKL1105    | <i>Bacillus paramycoides</i> NH24A2                      | MW828116      | 99.38         | G11   | White |
| TKL1121    | <i>Bacillus paramycoides</i> NH24A2                      | MW828123      | 99.72         | G11   | White |
| TKL434     | <i>Ornithinibacillus salinisoli</i> LCB256               | MW827941      | 99.86         | G12   | White |
| TKL931     | <i>Ornithinibacillus salinisoli</i> LCB256               | MW828062      | 99.79         | G12   | White |
| TKL1067    | <i>Oceanobacillus kimchii</i> X50                        | MW828104      | 99.86         | G12   | White |
| TKL242     | <i>Gracilibacillus dipsosauri</i> DD1                    | MW827884      | 99.37         | G13   | White |
| TKL244     | <i>Gracilibacillus dipsosauri</i> DD1                    | MW827885      | 99.23         | G13   | White |
| TKL190     | <i>Gracilibacillus ureilyticus</i> MF38                  | MW827869      | 99.23         | G14   | White |
| TKL156     | <i>Gracilibacillus ureilyticus</i> MF38                  | MW827864      | 98.88         | G14   | White |
| TKL97      | <i>Bacillus foraminis</i> CV53                           | MW827838      | 99.93         | none  | White |
| TKL101     | <i>Bacillus zhanjiangensis</i> JSM 099021                | MW827841      | 99.93         | none  | White |
| TKL939     | <i>Bacillus endolithicus</i> JC267                       | MW828065      | 98.28         | none  | White |
| TKL303     | <i>Bacillus cheonanensis</i> PFS-5                       | MW827907      | 99.79         | none  | White |
| TKL1071    | <i>Streptococcus pseudopneumoniae</i> ATCC BAA-960       | MW828106      | 99.51         | none  | White |
| TKL1002    | <i>Planococcus plakortidis</i> DSM 23997                 | MW828076      | 98.09         | none  | White |
| TKL1152    | <i>Planococcus citreus</i> DSM 20549                     | MW828138      | 99.64         | none  | Red   |
| TKL342     | <i>Bacillus infantis</i> NRRL B-14911                    | MW827920      | 99.58         | none  | White |
| TKL683     | <i>Bacillus salacetis</i> SKP7-4                         | MW828025      | 99.06         | none  | White |
| TKL239     | <i>Bacillus solisilvae</i> NEAU-cbsb5                    | MW827883      | 99.35         | none  | White |
| TKL96      | <i>Bacillus thuringiensis</i> ATCC 10792                 | MW827837      | 99.86         | none  | White |
| TKL644     | <i>Sediminibacillus albus</i> NHBX5                      | MW828008      | 99.93         | none  | White |
| TKL1135    | <i>Sediminibacillus halophilus</i> EN8d                  | MW828131      | 99.65         | none  | White |
| TKL667     | <i>Bacillus alcalophilus</i> DSM 485                     | MW828019      | 98.76         | none  | White |
| TKL302     | <i>Paenibacillus massiliensis</i> Smarlab BioMol-2301065 | MW827906      | 99.29         | none  | White |
| TKL857     | <i>Paenibacillus jamilae</i> KACC 10925                  | MW828040      | 99.65         | none  | White |
| TKL523     | <i>Arthrobacter tumbae</i> LMG 19501                     | MW827968      | 98.87         | G15   | White |
| TKL550     | <i>Arthrobacter tumbae</i> LMG 19501                     | MW827977      | 99.57         | G15   | White |
| TKL594     | <i>Arthrobacter tumbae</i> LMG 19501                     | MW827987      | 99.64         | G15   | White |
| TKL648     | <i>Arthrobacter tumbae</i> LMG 19501                     | MW828010      | 99.78         | G15   | White |
| TKL824     | <i>Arthrobacter tumbae</i> LMG 19501                     | MW828037      | 99.50         | G15   | White |
| TKL946     | <i>Arthrobacter tumbae</i> LMG 19501                     | MW828067      | 99.50         | G15   | White |
| TKL1054    | <i>Arthrobacter tumbae</i> LMG 19501                     | MW828097      | 99.64         | G15   | White |
| TKL1069    | <i>Arthrobacter tumbae</i> LMG 19501                     | MW828105      | 99.78         | G15   | White |
| TKL1099    | <i>Arthrobacter tumbae</i> LMG 19501                     | MW828115      | 99.15         | G15   | White |
| TKL1130    | <i>Arthrobacter tumbae</i> LMG 19501                     | MW828128      | 98.57         | G15   | White |
| TKL1159    | <i>Arthrobacter tumbae</i> LMG 19501                     | MW828141      | 99.50         | G15   | White |
| TKL1167    | <i>Arthrobacter tumbae</i> LMG 19501                     | MW828147      | 99.57         | G15   | White |
| TKL309     | <i>Modestobacter roseus</i> KLBMP 1279                   | MW827911      | 99.85         | G16   | White |
| TKL390     | <i>Glutamicibacter creatinolyticus</i> JCM 19049         | MW827929      | 99.85         | G16   | Red   |
| TKL820     | <i>Glutamicibacter creatinolyticus</i> JCM 19049         | MW828035      | 99.84         | G16   | Red   |
| TKL859     | <i>Glutamicibacter creatinolyticus</i> JCM 19049         | MW828041      | 99.85         | G16   | White |
| TKL306     | <i>Arthrobacter oryzae</i> KV-651                        | MW827909      | 98.99         | G17   | White |

| Strain No. | Similarity Strain                                                     | Accession No. | Similarity/ % | Group | Color     |
|------------|-----------------------------------------------------------------------|---------------|---------------|-------|-----------|
| TKL308     | <i>Arthrobacter oryzae</i> KV-651                                     | MW827910      | 98.89         | G17   | White     |
| TKL541     | <i>Arthrobacter ginsengisoli</i> DCY81                                | MW827973      | 99.04         | G17   | White     |
| TKL1133    | <i>Arthrobacter oryzae</i> KV-651                                     | MW828129      | 98.99         | G17   | White     |
| TKL506     | <i>Kocuria turfanaensis</i> HO-9042                                   | MW827964      | 99.43         | G18   | Gold      |
| TKL556     | <i>Kocuria rosea</i> DSM 20447                                        | MW827979      | 99.28         | G18   | Gold      |
| TKL953     | <i>Kocuria turfanaensis</i> HO-9042                                   | MW828070      | 98.71         | G18   | Gold      |
| TKL1001    | <i>Kocuria polaris</i> CMS 76or                                       | MW828075      | 100.00        | G18   | Gold      |
| TKL1092    | <i>Kocuria turfanaensis</i> HO-9042                                   | MW828112      | 99.64         | G18   | Pink      |
| TKL570     | <i>Kocuria rosea</i> DSM 20447                                        | MW827982      | 99.78         | G19   | Red       |
| TKL1060    | <i>Kocuria salina</i> Hv14b                                           | MW828102      | 99.28         | G19   | Red       |
| TKL1106    | <i>Kocuria salina</i> Hv14b                                           | MW828117      | 99.28         | G19   | Red       |
| TKL737     | <i>Microbacterium ginsengisoli</i> DSM 18659                          | MW828031      | 98.22         | G20   | White     |
| TKL1144    | <i>Microbacterium ginsengisoli</i> DSM 18659                          | MW828134      | 98.64         | G20   | White     |
| TKL26      | <i>Nocardiopsis sinuspersici</i> HM6                                  | MW827810      | 98.78         | G21   | White     |
| TKL197     | <i>Nocardiopsis dassonvillei</i> subsp. <i>Dassonvillei</i> DSM 43111 | MW827870      | 98.64         | G21   | White     |
| TKL237     | <i>Nocardiopsis dassonvillei</i> subsp. <i>Dassonvillei</i> DSM 43111 | MW827882      | 98.85         | G21   | White     |
| TKL338     | <i>Nocardiopsis sinuspersici</i> HM6                                  | MW827919      | 98.78         | G21   | White     |
| TKL400     | <i>Nocardiopsis sinuspersici</i> HM6                                  | MW827934      | 98.78         | G21   | White     |
| TKL491     | <i>Saccharothrix isguenensis</i> MB27                                 | MW827960      | 99.13         | G21   | White     |
| TKL656     | <i>Nocardiopsis sinuspersici</i> HM6                                  | MW828015      | 98.78         | G21   | White     |
| TKL1138    | <i>Nocardiopsis dassonvillei</i> subsp. <i>Dassonvillei</i> DSM 43111 | MW828132      | 98.51         | G21   | White     |
| TKL1057    | <i>Kocuria indica</i> NIO-1021                                        | MW828099      | 99.93         | G22   | Gold      |
| TKL1117    | <i>Kocuria indica</i> NIO-1021                                        | MW828120      | 99.64         | G22   | White     |
| TKL262     | <i>Saccharothrix isguenensis</i> MB27                                 | MW827892      | 99.27         | G23   | White     |
| TKL426     | <i>Saccharothrix isguenensis</i> MB27                                 | MW827940      | 99.13         | G23   | White     |
| TKL453     | <i>Saccharothrix isguenensis</i> MB27                                 | MW827950      | 99.13         | G23   | White     |
| TKL485     | <i>Nocardiopsis dassonvillei</i> subsp. <i>Dassonvillei</i> DSM 43111 | MW827958      | 99.43         | G23   | White     |
| TKL488     | <i>Saccharothrix isguenensis</i> MB27                                 | MW827959      | 99.13         | G23   | White     |
| TKL649     | <i>Saccharothrix isguenensis</i> MB27                                 | MW828011      | 99.17         | G23   | White     |
| TKL50      | <i>Streptomyces luridus</i> NBRC 12793                                | MW827821      | 99.48         | G24   | White     |
| TKL91      | <i>Streptomyces roseolilacinus</i> NBRC 12815                         | MW827833      | 99.26         | G24   | White     |
| TKL99      | <i>Streptomyces luteus</i> TRM 45540                                  | MW827840      | 99.78         | G25   | White     |
| TKL281     | <i>Streptomyces luteus</i> TRM 45540                                  | MW827896      | 98.95         | G25   | White     |
| TKL18      | <i>Streptomyces indoligenes</i> TRM 43006                             | MW827803      | 99.92         | G26   | White     |
| TKL32      | <i>Streptomyces roseolilacinus</i> NBRC 12815                         | MW827813      | 99.26         | G26   | White     |
| TKL605     | <i>Streptomyces roseolilacinus</i> NBRC 12815                         | MW827993      | 99.49         | G26   | White     |
| TKL622     | <i>Streptomyces roseolilacinus</i> NBRC 12815                         | MW828000      | 99.41         | G26   | White     |
| TKL630     | <i>Streptomyces roseolilacinus</i> NBRC 12815                         | MW828003      | 99.28         | G26   | White     |
| TKL911     | <i>Streptomyces roseolilacinus</i> NBRC 12815                         | MW828053      | 99.42         | G26   | White     |
| TKL1166    | <i>Streptomyces roseolilacinus</i> NBRC 12815                         | MW828146      | 99.42         | G26   | Navy Blue |
| TKL17      | <i>Streptomyces xinghaiensis</i> S187                                 | MW827802      | 99.93         | G27   | White     |
| TKL120     | <i>Streptomyces xinghaiensis</i> S187                                 | MW827850      | 99.93         | G27   | White     |
| TKL265     | <i>Streptomyces xinghaiensis</i> S187                                 | MW827894      | 100.00        | G27   | White     |



| Strain No. | Similarity Strain                                                     | Accession No. | Similarity/ % | Group | Color |
|------------|-----------------------------------------------------------------------|---------------|---------------|-------|-------|
| TKL336     | <i>Streptomyces xinghaiensis</i> S187                                 | MW827918      | 99.93         | G27   | White |
| TKL422     | <i>Streptomyces xinghaiensis</i> S187                                 | MW827939      | 99.93         | G27   | White |
| TKL16      | <i>Streptomyces radiopugnans</i> R97                                  | MW827801      | 98.60         | G28   | White |
| TKL74      | <i>Streptomyces radiopugnans</i> R97                                  | MW827824      | 98.52         | G28   | White |
| TKL684     | <i>Streptomyces fenghuangensis</i> GIMN4.003                          | MW828026      | 99.01         | G28   | White |
| TKL690     | <i>Streptomyces mangrovi</i> HA11110                                  | MW828028      | 98.60         | G28   | White |
| TKL1047    | <i>Streptomyces fenghuangensis</i> GIMN4.003                          | MW828093      | 98.28         | G28   | White |
| TKL1157    | <i>Streptomyces radiopugnans</i> R97                                  | MW828140      | 98.43         | G28   | White |
| TKL578     | <i>Streptomyces mangrovi</i> HA11110                                  | MW827983      | 99.41         | G29   | White |
| TKL596     | <i>Streptomyces mangrovi</i> HA11110                                  | MW827989      | 99.34         | G29   | White |
| TKL1019    | <i>Streptomyces mangrovi</i> HA11110                                  | MW828081      | 99.34         | G29   | White |
| TKL81      | <i>Streptomyces verrucosissporus</i> CPB1-1                           | MW827829      | 99.18         | G30   | White |
| TKL159     | <i>Streptomyces radiopugnans</i> R97                                  | MW827865      | 98.97         | G30   | White |
| TKL394     | <i>Streptomyces radiopugnans</i> R97                                  | MW827932      | 99.11         | G30   | White |
| TKL31      | <i>Streptomyces atrovirens</i> NRRL B-16357                           | MW827812      | 99.11         | G31   | White |
| TKL122     | <i>Streptomyces pseudogriseolus</i> NRRL B-3288                       | MW827851      | 99.04         | G31   | Pink  |
| TKL147     | <i>Streptomyces pseudogriseolus</i> NRRL B-3288                       | MW827861      | 99.10         | G31   | Pink  |
| TKL233     | <i>Streptomyces pseudogriseolus</i> NRRL B-3288                       | MW827879      | 99.04         | G31   | Pink  |
| TKL538     | <i>Streptomyces griseoviridis</i> NBRC 12874                          | MW827972      | 98.97         | G31   | White |
| TKL635     | <i>Streptomyces pseudogriseolus</i> NRRL B-3288                       | MW828004      | 99.04         | G31   | White |
| TKL1143    | <i>Streptomyces pseudogriseolus</i> NRRL B-3288                       | MW828133      | 99.14         | G31   | White |
| TKL348     | <i>Streptomyces atrovirens</i> NRRL B-16357                           | MW827921      | 99.70         | G32   | White |
| TKL351     | <i>Streptomyces atrovirens</i> NRRL B-16357                           | MW827923      | 99.71         | G32   | Red   |
| TKL450     | <i>Streptomyces atrovirens</i> NRRL B-16357                           | MW827947      | 99.78         | G32   | Red   |
| TKL511     | <i>Streptomyces hawaiiensis</i> NBRC 12784                            | MW827966      | 99.33         | G32   | White |
| TKL567     | <i>Streptomyces atrovirens</i> NRRL B-16357                           | MW827981      | 99.50         | G32   | White |
| TKL1146    | <i>Streptomyces atrovirens</i> NRRL B-16357                           | MW828136      | 99.78         | G32   | White |
| TKL153     | <i>Streptomyces thinghirensis</i> DSM 41919                           | MW827863      | 99.63         | G33   | White |
| TKL227     | <i>Streptomyces thinghirensis</i> DSM 41919                           | MW827876      | 99.42         | G33   | White |
| TKL566     | <i>Streptomyces griseoviridis</i> NBRC 12874                          | MW827980      | 98.23         | G33   | White |
| TKL968     | <i>Nocardioideis terrigena</i> DS-17                                  | MW828073      | 99.78         | G34   | White |
| TKL1056    | <i>Nocardioideis terrigena</i> DS-17                                  | MW828098      | 99.78         | G34   | White |
| TKL7       | <i>Streptomyces griseoviridis</i> NBRC 12874                          | MW827797      | 98.97         | G35   | White |
| TKL171     | <i>Streptomyces griseoviridis</i> NBRC 12874                          | MW827867      | 98.31         | G35   | White |
| TKL186     | <i>Streptomyces griseoviridis</i> NBRC 12874                          | MW827868      | 98.97         | G35   | White |
| TKL315     | <i>Streptomyces griseoviridis</i> NBRC 12874                          | MW827913      | 98.97         | G35   | White |
| TKL352     | <i>Streptomyces griseoviridis</i> NBRC 12874                          | MW827924      | 98.97         | G35   | White |
| TKL461     | <i>Streptomyces griseoviridis</i> NBRC 12874                          | MW827953      | 98.98         | G35   | White |
| TKL503     | <i>Streptomyces griseoviridis</i> NBRC 12874                          | MW827963      | 98.98         | G35   | White |
| TKL531     | <i>Nocardiopsis dassonvillei</i> subsp. <i>Dassonvillei</i> DSM 43111 | MW827969      | 95.06         | G35   | White |
| TKL533     | <i>Streptomyces griseoviridis</i> NBRC 12874                          | MW827970      | 98.98         | G35   | White |
| TKL542     | <i>Streptomyces griseoviridis</i> NBRC 12874                          | MW827974      | 98.97         | G35   | White |
| TKL548     | <i>Streptomyces pseudogriseolus</i> NRRL B-3288                       | MW827975      | 99.04         | G35   | White |

| Strain No. | Similarity Strain                                                     | Accession No. | Similarity/ % | Group | Color  |
|------------|-----------------------------------------------------------------------|---------------|---------------|-------|--------|
| TKL549     | <i>Streptomyces griseoviridis</i> NBRC 12874                          | MW827976      | 98.97         | G35   | White  |
| TKL555     | <i>Streptomyces griseoviridis</i> NBRC 12874                          | MW827978      | 98.98         | G35   | White  |
| TKL599     | <i>Streptomyces griseoviridis</i> NBRC 12874                          | MW827990      | 98.83         | G35   | White  |
| TKL608     | <i>Streptomyces griseoviridis</i> NBRC 12874                          | MW827996      | 98.95         | G35   | White  |
| TKL619     | <i>Streptomyces griseoviridis</i> NBRC 12874                          | MW827998      | 98.98         | G35   | White  |
| TKL620     | <i>Streptomyces griseoviridis</i> NBRC 12874                          | MW827999      | 98.98         | G35   | White  |
| TKL751     | <i>Streptomyces griseoviridis</i> NBRC 12874                          | MW828032      | 98.95         | G35   | White  |
| TKL908     | <i>Streptomyces griseoviridis</i> NBRC 12874                          | MW828052      | 98.38         | G35   | White  |
| TKL897     | <i>Streptomyces griseoviridis</i> NBRC 12874                          | MW828051      | 98.99         | G35   | White  |
| TKL913     | <i>Streptomyces griseoviridis</i> NBRC 12874                          | MW828054      | 98.99         | G35   | White  |
| TKL1134    | <i>Streptomyces griseoviridis</i> NBRC 12874                          | MW828130      | 98.99         | G35   | White  |
| TKL43      | <i>Janibacter limosus</i> DSM 11140                                   | MW827817      | 99.78         | none  | White  |
| TKL53      | <i>Georgenia satyanarayanai</i> JC82                                  | MW827823      | 99.77         | none  | Red    |
| TKL92      | <i>Streptomyces tuirus</i> NBRC 15617                                 | MW827834      | 99.48         | none  | White  |
| TKL105     | <i>Zhihengliuella alba</i> YIM 90734                                  | MW827844      | 99.34         | none  | White  |
| TKL225     | <i>Nocardiopsis dassonvillei</i> subsp. <i>Dassonvillei</i> DSM 43111 | MW827875      | 95.06         | none  | White  |
| TKL257     | <i>Streptomyces ferrugineus</i> HV38                                  | MW827889      | 99.42         | none  | White  |
| TKL304     | <i>Pseudarthrobacter siccitolerans</i> 4J27                           | MW827908      | 99.28         | none  | White  |
| TKL320     | <i>Pseudoclavibacter terrae</i> THG-MD12                              | MW827915      | 99.93         | none  | White  |
| TKL325     | <i>Streptomyces manganisoli</i> MK44                                  | MW827917      | 98.81         | none  | White  |
| TKL405     | <i>Plantactinospora endophytica</i> YIM 68255                         | MW827936      | 99.41         | none  | White  |
| TKL443     | <i>Diaminobutyricimonas aerilata</i> 6408J-67                         | MW827945      | 98.15         | none  | White  |
| TKL451     | <i>Auraticoccus monumenti</i> MON 2.2                                 | MW827948      | 99.56         | none  | White  |
| TKL458     | <i>Blastococcus xanthinilyticus</i> BMG 862                           | MW827951      | 98.72         | none  | White  |
| TKL483     | <i>Nocardioides furvisabuli</i> SBS-26                                | MW827957      | 99.13         | none  | White  |
| TKL600     | <i>Pseudarthrobacter phenanthrenivorans</i> Sphe3                     | MW827991      | 99.34         | none  | White  |
| TKL647     | <i>Kineococcus radiotolerans</i> SRS30216                             | MW828009      | 97.72         | none  | White  |
| TKL651     | <i>Streptomyces griseoviridis</i> NBRC 12874                          | MW828013      | 98.82         | none  | Red    |
| TKL676     | <i>Cellulosimicrobium marinum</i> RS-7-4                              | MW828022      | 99.20         | none  | White  |
| TKL727     | <i>Arthrobacter agilis</i> DSM 20550                                  | MW828030      | 99.56         | none  | White  |
| TKL860     | <i>Citricoccus zhacaiensis</i> FS24                                   | MW828042      | 98.50         | none  | White  |
| TKL920     | <i>Neomicrococcus lactis</i> DW152                                    | MW828058      | 100.00        | none  | White  |
| TKL955     | <i>Mycolicibacterium iranicum</i> DSM 45541                           | MW828071      | 100.00        | none  | White  |
| TKL1023    | <i>Streptomyces griseoviridis</i> NBRC 12874                          | MW828083      | 98.98         | none  | White  |
| TKL1045    | <i>Micrococcus flavus</i> LW4                                         | MW828091      | 99.93         | none  | White  |
| TKL1080    | <i>Rothia mucilaginosa</i> ATCC 25296                                 | MW828107      | 99.50         | none  | White  |
| TKL1151    | <i>Blastococcus aggregatus</i> DSM 4725                               | MW828137      | 99.49         | none  | White  |
| TKL1164    | <i>Micrococcus aloeverae</i> AE-6                                     | MW828144      | 98.69         | none  | Orange |
| TKL391     | <i>Pseudochrobactrum saccharolyticum</i> CCUG 33852                   | MW827930      | 100.00        | G36   | White  |
| TKL392     | <i>Pseudochrobactrum saccharolyticum</i> CCUG 33852                   | MW827931      | 100.00        | G36   | White  |
| TKL452     | <i>Pseudochrobactrum saccharolyticum</i> CCUG 33852                   | MW827949      | 100.00        | G36   | White  |
| TKL856     | <i>Psychrobacter pulmonis</i> CECT 5989                               | MW828039      | 99.85         | G36   | White  |
| TKL883     | <i>Pseudomonas songnenensis</i> NEAU-ST5-5                            | MW828049      | 98.65         | G36   | White  |

| Strain No. | Similarity Strain                                   | Accession No. | Similarity/ % | Group | Color       |
|------------|-----------------------------------------------------|---------------|---------------|-------|-------------|
| TKL925     | <i>Lysobacter bugurensis</i> ZLD-29                 | MW828059      | 98.96         | G36   | White       |
| TKL290     | <i>Chelativorans multitrophicus</i> DSM 9103        | MW827899      | 98.82         | G37   | White       |
| TKL439     | <i>Chelativorans multitrophicus</i> DSM 9103        | MW827943      | 98.44         | G37   | White       |
| TKL626     | <i>Pantoea eucrina</i> LMG 2781                     | MW828002      | 99.93         | G38   | White       |
| TKL823     | <i>Paracoccus aerius</i> 11410                      | MW828036      | 98.51         | G38   | Red         |
| TKL866     | <i>Pseudomonas songnenensis</i> NEAU-ST5-5          | MW828045      | 99.36         | G38   | White       |
| TKL448     | <i>Altererythrobacter soli</i> MN-1                 | MW827946      | 97.86         | G39   | White       |
| TKL675     | <i>Altererythrobacter soli</i> MN-1                 | MW828021      | 98.00         | G39   | White       |
| TKL500     | <i>Altererythrobacter soli</i> MN-1                 | MW827962      | 98.01         | G40   | White       |
| TKL655     | <i>Altererythrobacter soli</i> MN-1                 | MW828014      | 97.85         | G40   | White       |
| TKL798     | <i>Paracoccus hibisci</i> THG-T2.8                  | MW828033      | 99.23         | G40   | White       |
| TKL8       | <i>Acinetobacter lwoffii</i> NCTC 5866              | MW827798      | 99.78         | G41   | White       |
| TKL20      | <i>Acinetobacter lwoffii</i> NCTC 5866              | MW827805      | 99.85         | G41   | White       |
| TKL1109    | <i>Pseudomonas songnenensis</i> NEAU-ST5-5          | MW828118      | 98.79         | G41   | White       |
| TKL863     | <i>Devosia chinhatensis</i> IPL18                   | MW828043      | 97.59         | G42   | White       |
| TKL1033    | <i>Pseudomonas songnenensis</i> NEAU-ST5-5          | MW828087      | 98.79         | G42   | White       |
| TKL510     | <i>Pseudomonas songnenensis</i> NEAU-ST5-5          | MW827965      | 99.00         | G43   | White       |
| TKL593     | <i>Pseudomonas xanthomarina</i> DSM 18231           | MW827986      | 99.43         | G43   | White       |
| TKL595     | <i>Pseudomonas songnenensis</i> NEAU-ST5-5          | MW827988      | 98.79         | G43   | White       |
| TKL603     | <i>Pseudomonas songnenensis</i> NEAU-ST5-5          | MW827992      | 98.85         | G43   | White       |
| TKL606     | <i>Pseudomonas xanthomarina</i> DSM 18231           | MW827994      | 99.50         | G43   | Gold        |
| TKL624     | <i>Paracoccus hibisci</i> THG-T2.8                  | MW828001      | 99.23         | G43   | White       |
| TKL870     | <i>Pararhodobacter aggregans</i> D1-19              | MW750564      | 96.38         | G43   | White       |
| TKL917     | <i>Pseudochrobactrum saccharolyticum</i> CCUG 33852 | MW828056      | 98.91         | G43   | White       |
| TKL947     | <i>Pseudomonas songnenensis</i> NEAU-ST5-5          | MW828068      | 99.29         | G43   | Light Green |
| TKL957     | <i>Pseudomonas songnenensis</i> NEAU-ST5-5          | MW828072      | 99.22         | G43   | White       |
| TKL997     | <i>Pseudomonas kunmingensis</i> HL22-2              | MW828074      | 99.28         | G43   | White       |
| TKL1020    | <i>Pseudomonas songnenensis</i> NEAU-ST5-5          | MW828082      | 99.27         | G43   | White       |
| TKL1043    | <i>Pseudomonas songnenensis</i> NEAU-ST5-5          | MW828089      | 99.28         | G43   | White       |
| TKL1050    | <i>Pseudomonas songnenensis</i> NEAU-ST5-5          | MW828094      | 99.05         | G43   | White       |
| TKL1066    | <i>Pseudomonas songnenensis</i> NEAU-ST5-5          | MW828103      | 99.15         | G43   | White       |
| TKL1083    | <i>Acinetobacter lwoffii</i> NCTC 5866              | MW828108      | 99.64         | G43   | White       |
| TKL1110    | <i>Pseudomonas songnenensis</i> NEAU-ST5-5          | MW828119      | 99.29         | G43   | White       |
| TKL1118    | <i>Psychrobacter pulmonis</i> CECT 5989             | MW828121      | 99.71         | G43   | Green       |
| TKL1126    | <i>Pseudomonas xanthomarina</i> DSM 18231           | MW828126      | 99.22         | G43   | White       |
| TKL1145    | <i>Pseudomonas songnenensis</i> NEAU-ST5-5          | MW828135      | 99.22         | G43   | White       |
| TKL1165    | <i>Pseudomonas songnenensis</i> NEAU-ST5-5          | MW828145      | 98.54         | G43   | White       |
| TKL533     | <i>Pseudomonas songnenensis</i> NEAU-ST5-5          | MW827971      | 98.93         | G44   | White       |
| TKL948     | <i>Pseudomonas songnenensis</i> NEAU-ST5-5          | MW828069      | 98.82         | G44   | White       |
| TKL1028    | <i>Altererythrobacter soli</i> MN-1                 | MW828086      | 97.39         | G44   | White       |
| TKL1086    | <i>Pseudomonas songnenensis</i> NEAU-ST5-5          | MW828109      | 99.22         | G44   | White       |
| TKL35      | <i>Altererythrobacter soli</i> MN-1                 | MW827814      | 97.95         | none  | Gold        |
| TKL166     | <i>Massilia agri</i> K-3-1                          | MW827866      | 98.85         | none  | White       |

| Strain No. | Similarity Strain                                   | Accession No. | Similarity/ % | Group | Color  |
|------------|-----------------------------------------------------|---------------|---------------|-------|--------|
| TKL478     | <i>Rhizobium halotolerans</i> AB21                  | MW827955      | 98.07         | none  | White  |
| TKL642     | <i>Altererythrobacter soli</i> MN-1                 | MW828007      | 98.00         | none  | White  |
| TKL855     | <i>Pseudochrobactrum saccharolyticum</i> CCUG 33852 | MW828038      | 99.85         | none  | Pink   |
| TKL865     | <i>Paracoccus hibisci</i> THG-T2.8                  | MW828044      | 99.16         | none  | Red    |
| TKL876     | <i>Pseudochrobactrum saccharolyticum</i> CCUG 33852 | MW828048      | 99.78         | none  | White  |
| TKL930     | <i>Shigella flexneri</i> ATCC 29903                 | MW828061      | 99.86         | none  | White  |
| TKL936     | <i>Pseudomonas songnenensis</i> NEAU-ST5-5          | MW828063      | 99.29         | none  | Yellow |
| TKL1034    | <i>Pseudomonas songnenensis</i> NEAU-ST5-5          | MW828088      | 99.27         | none  | White  |
| TKL497     | <i>Pontibacter rugosus</i> KYW1030                  | MW827961      | 97.65         | none  | White  |
| TKL664     | <i>Sphingobacterium kitahiroshimense</i> 10C        | MW828018      | 99.56         | none  | White  |
